# Supplementary material for: Atomic layer deposition of zinc oxide onto and into P3HT for hybrid photovoltaics
Source: Royal Society of Chemistry journal article supplement (doi:10.1039/c4tc01629g), 2014-01-01
Supplement: c4tc01629g1.pdf [file c4tc01629g1.pdf]

### **Calculation of the deposited Zn mass:**

$$\frac{\%wt(Zn)}{\%wt(S)} = \frac{\frac{M(Zn)}{M_{tot}}}{\frac{M(S)}{M_{tot}}} = \frac{M(Zn)}{M(S)} = const \cdot M(Zn) \quad (S1)$$

Where  $M(Zn)$ ,  $M(S)$  and  $M_{tot}$  represent the masses of zinc, sulfur and total film mass respectively. For all samples, spin coating conditions were identical. Therefore, sulfur mass is regarded as constant for all films.

### **ZnO penetration into MEH-PPV films:**

The general approach of the proposed deposition technique is demonstrated by exposing MEH-PPV films to the same ALD sequence of DEZ and water. Figure S3 shows that for MEH-PPV, similarly to P3HT, ZnO grows inside the conjugated polymer film.

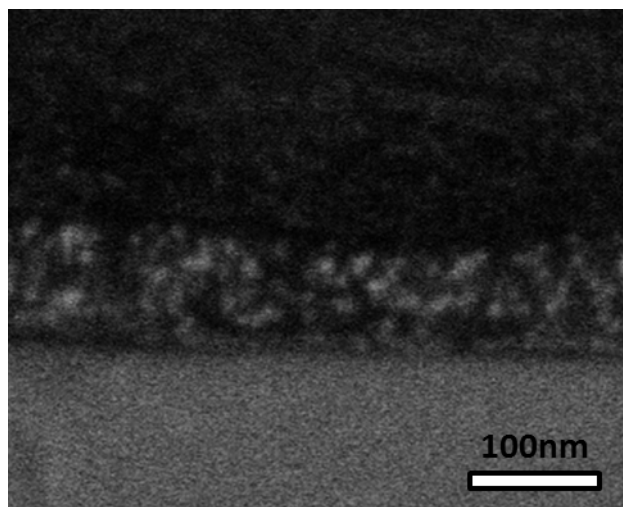

**Figure S2:** Cross section BSE HRSEM micrograph of a MEH-PPV film on a silicon substrate, after 50 ALD alternating cycles of DEZ and water.
